# Supplementary material for: Maleimide end-functionalized poly(2-oxazoline)s by the functional initiator route: synthesis and (bio)conjugation
Source: Royal Society of Chemistry journal article supplement (doi:10.1039/c8ra00948a), 2018-01-01
Supplement: c8ra00948a1.pdf [file c8ra00948a1.pdf]

Supporting information for

## Maleimide End-Functionalized Poly(2-oxazoline)s by the Functional Initiator Route: Synthesis and (Bio)conjugation

Gabriela Gil Alvaradejo,<sup>a,b</sup> Mathias Glassner,<sup>c</sup> Richard Hoogenboom,<sup>c</sup>  
Guillaume Delaittre<sup>a,b\*</sup>

### Characterization Data for the New Initiators

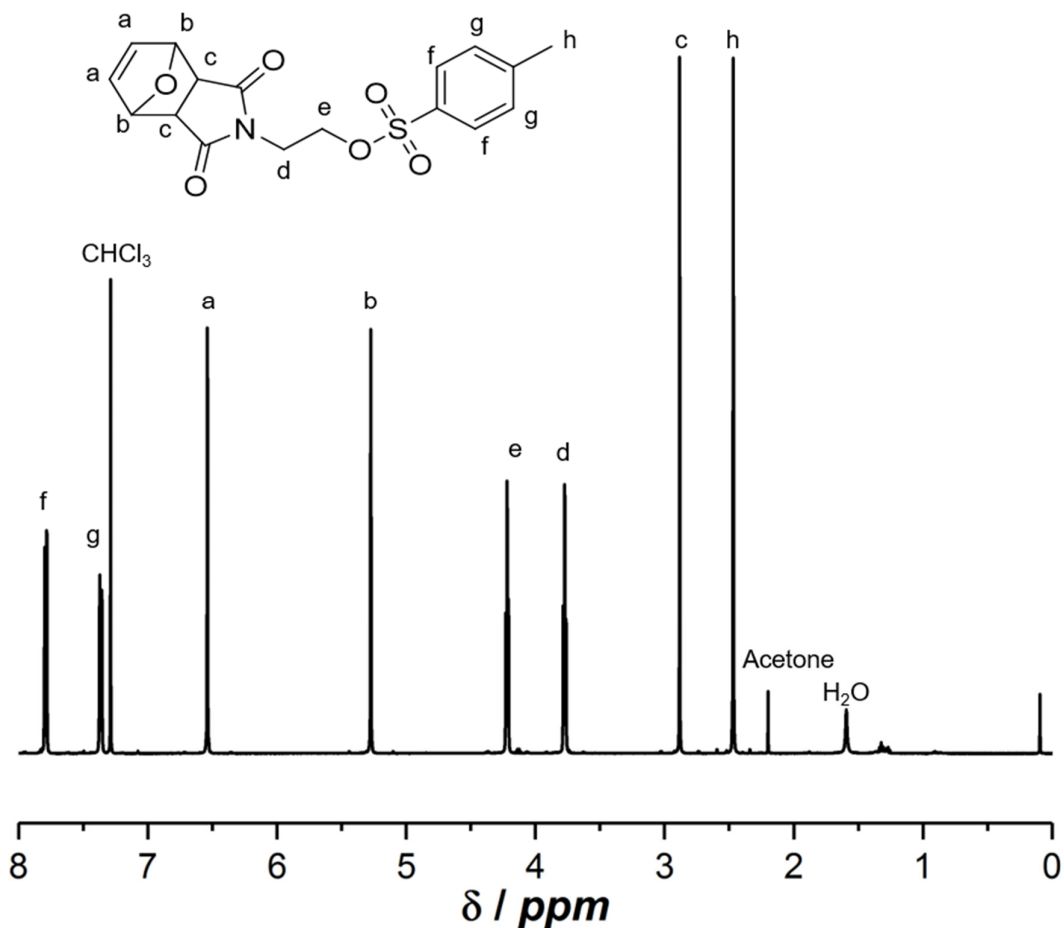

**Figure S1.** <sup>1</sup>H NMR spectrum of **FurMalTos 3** in CDCl<sub>3</sub>.

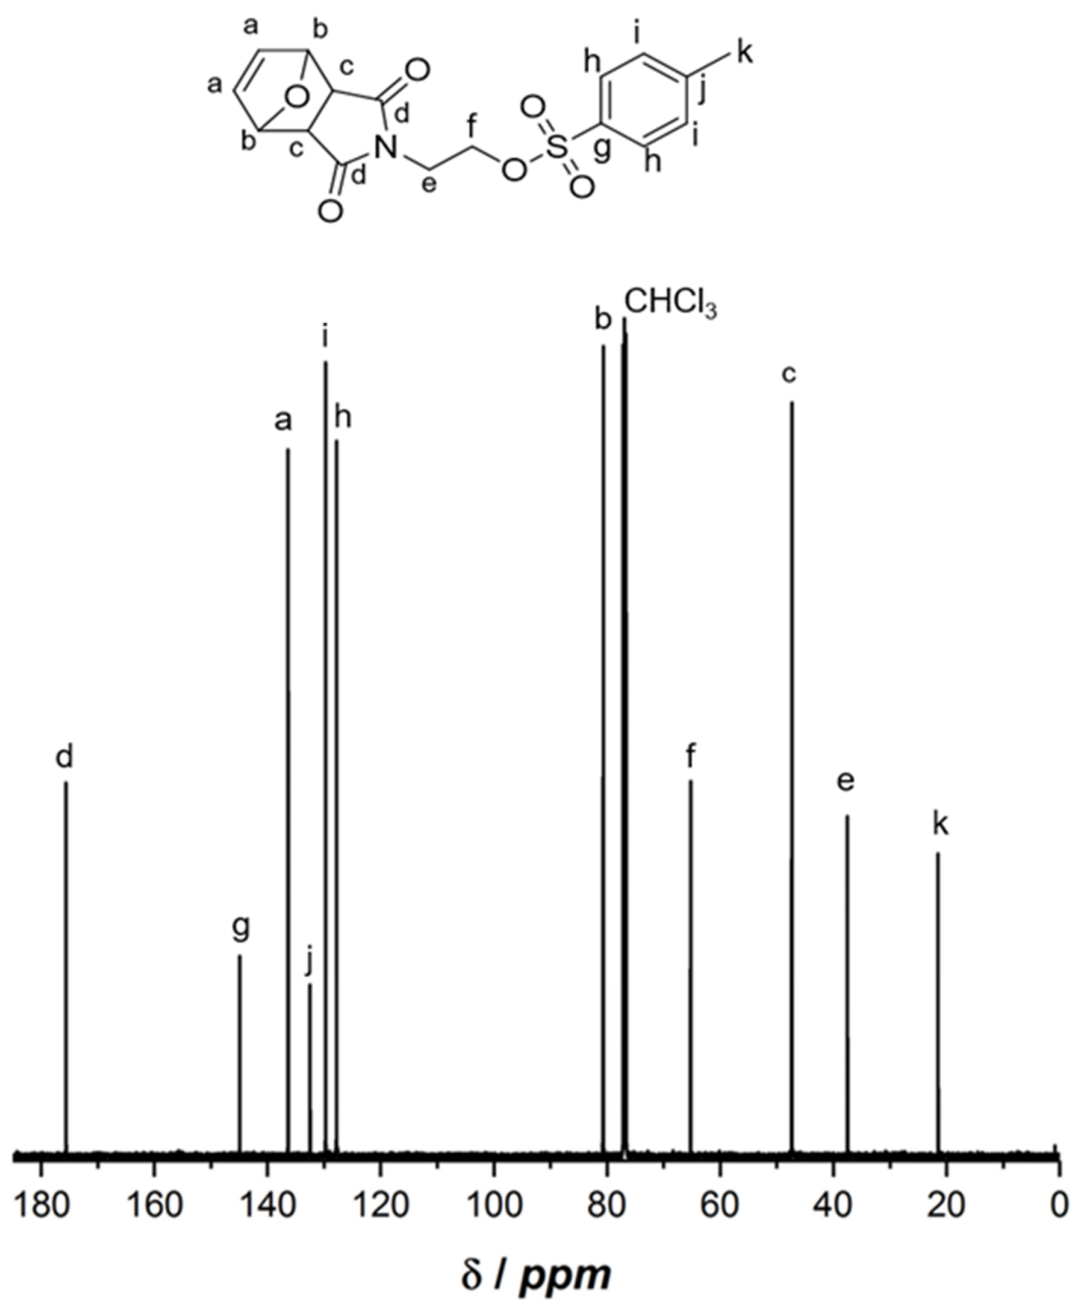

**Figure S2.**  $^{13}\text{C}$  NMR spectrum of **FurMalTos 3** in  $\text{CDCl}_3$ .

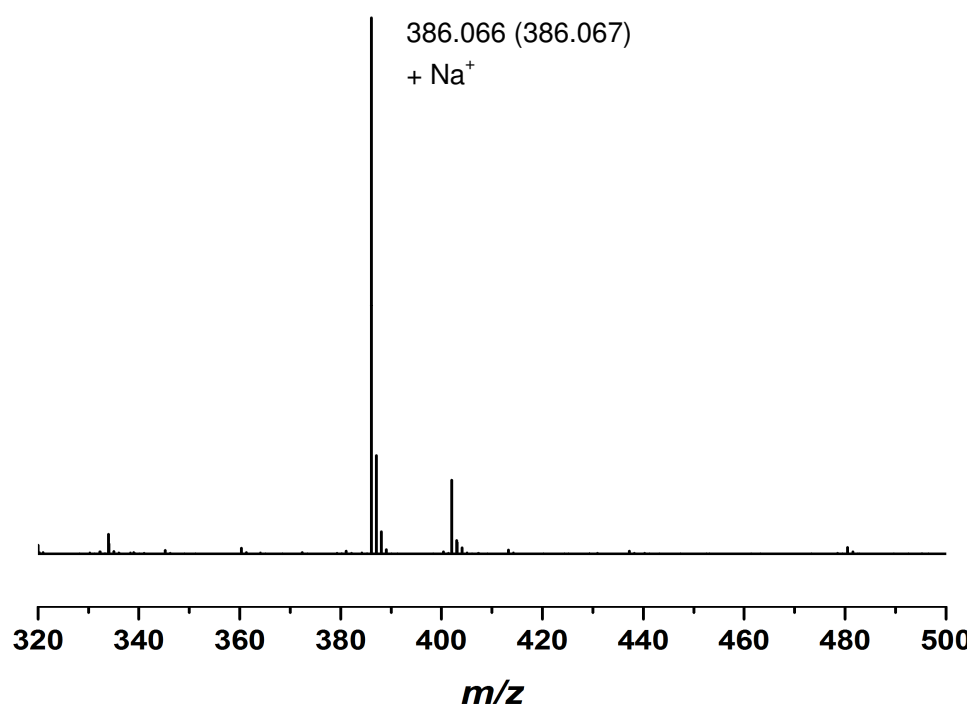

**Figure S3.** ESI mass spectrum of **FurMalTos 3**.

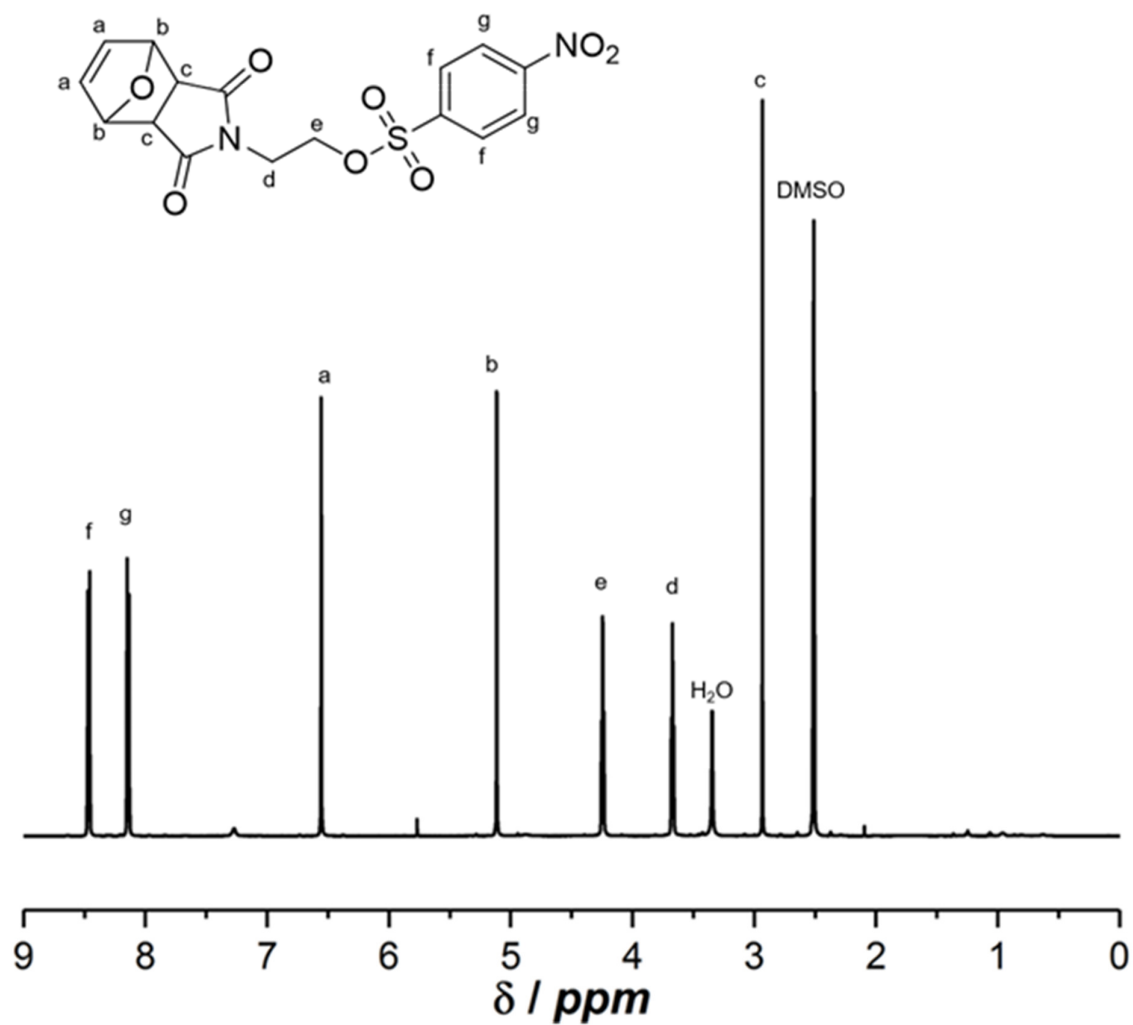

**Figure S4.**  $^1\text{H}$  NMR spectrum of **FurMalNos 4** in DMSO- $d_6$ .

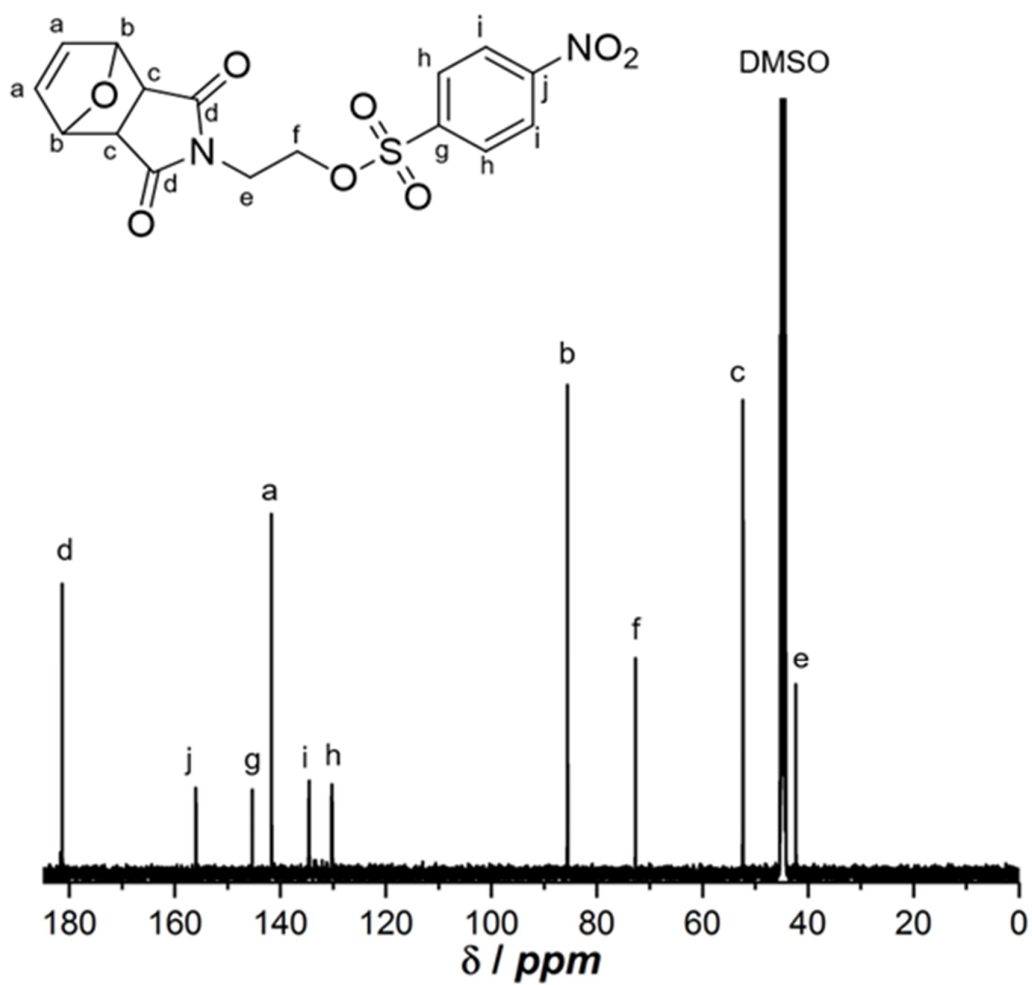

**Figure S5.**  $^{13}\text{C}$  NMR spectrum of **FurMalNos 4** in  $\text{DMSO-}d_6$ .

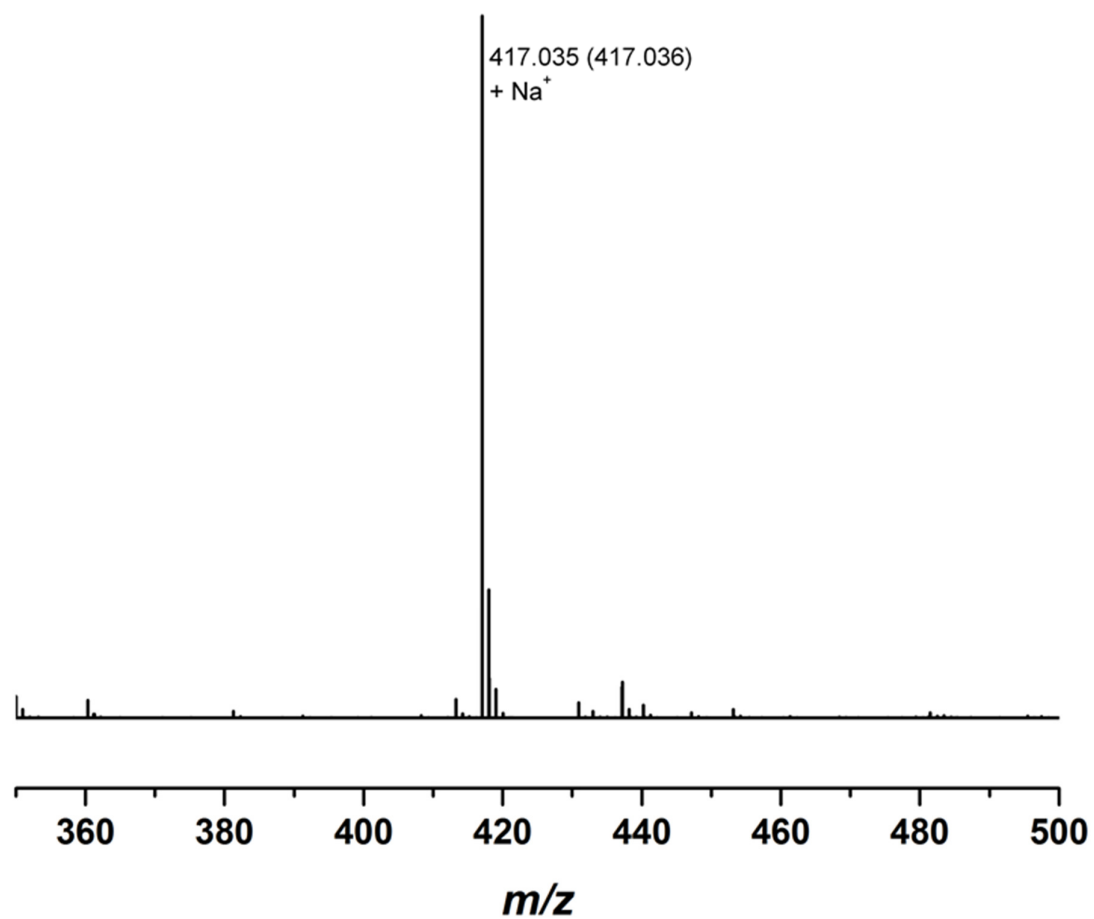

**Figure S6.** ESI mass spectrum of **FurMalNos 4**.

## Initial Polymerization Trials

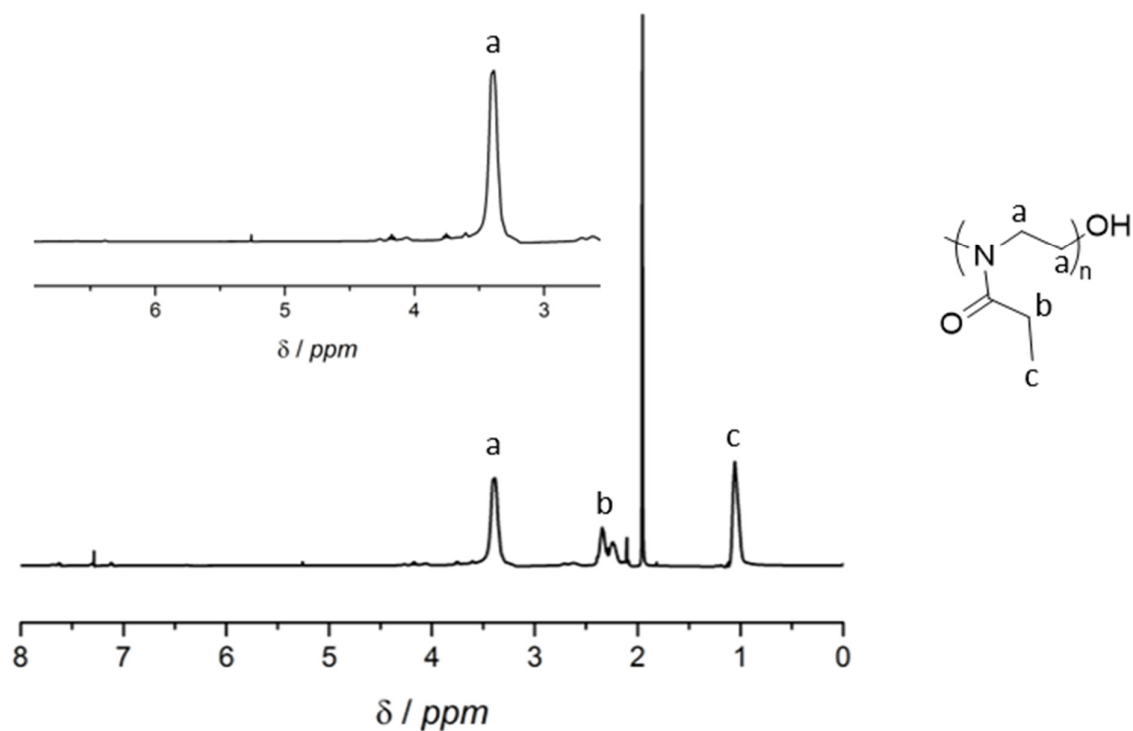

**Figure S7.**  $^1\text{H}$  NMR spectrum of crude polymer mixture after microwave-assisted polymerization of 2-ethyl-2-oxazoline using  $[\text{EtOx}]/[\text{FurMalTos } 3] = 40$  at  $80^\circ\text{C}$  for 50 minutes in acetonitrile. No end group signals remain.

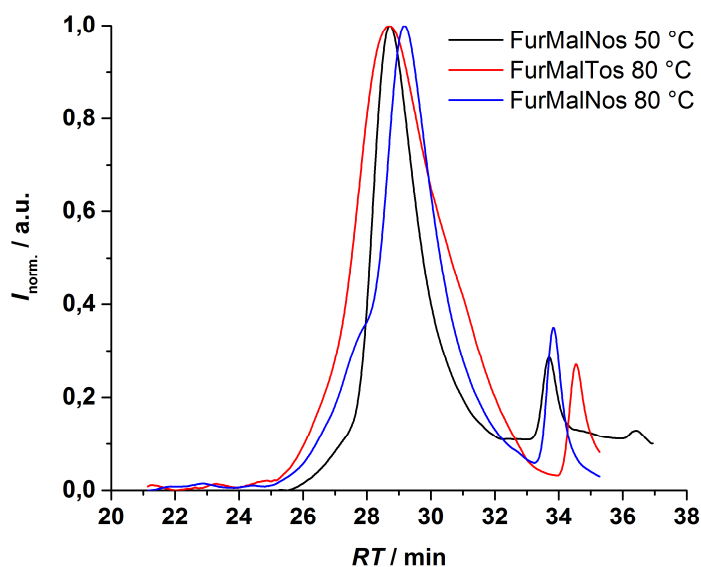

**Figure S8.** SEC traces of PETox obtained with either **FurMalNos 4** or **FurMalTos 3** as initiator and at either  $50^\circ\text{C}$  for 75 h or  $80^\circ\text{C}$  for 3 hours. Polymers made at  $80^\circ\text{C}$  show a broader distribution, indicating the loss of control over the polymerization at such temperature.

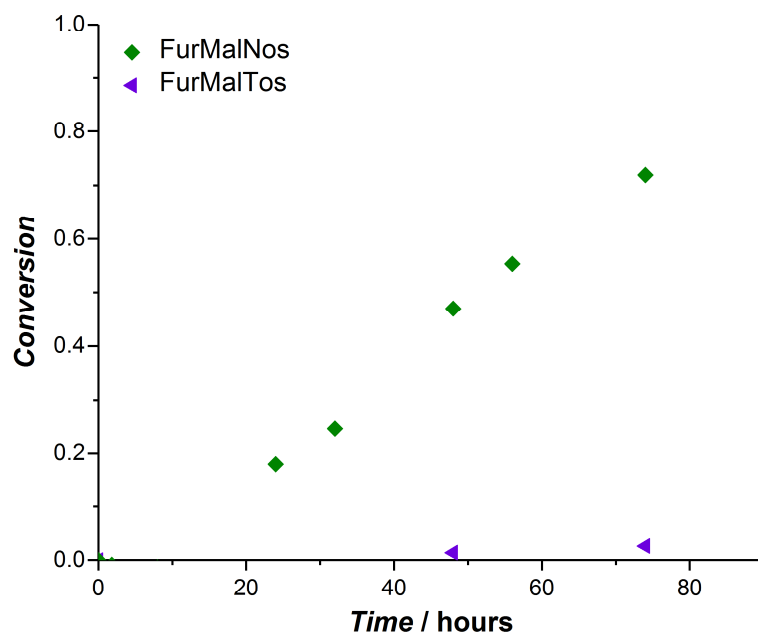

**Figure S9.** Monomer conversion as a function of time for the CROP of 2-ethyl-2-oxazoline at 50 °C in acetonitrile using **FurMalTos** and **FurMalNos** as initiators. [EtOx] = 1.5 M; [EtOx]/[Initiator] = 50.



**Kinetic Data Corresponding to the Polymerizations Described in Full in the Main Text (i.e., at 50 °C, [EtOx] = 1 M, using FurMalNos 4)**

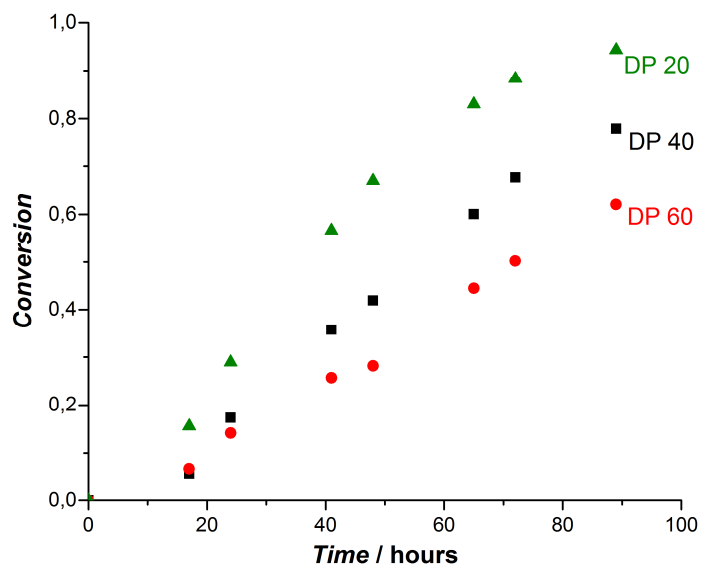

**Figure S10.** Monomer conversion as a function of time for the CROP of 2-ethyl-2-oxazoline at 50 °C in acetonitrile using **FurMalNos 4** as initiator at three distinct targeted degrees of polymerization ( $DP = [EtOx]/[FurMalNos]$ ).  $[EtOx] = 1.5$  M.

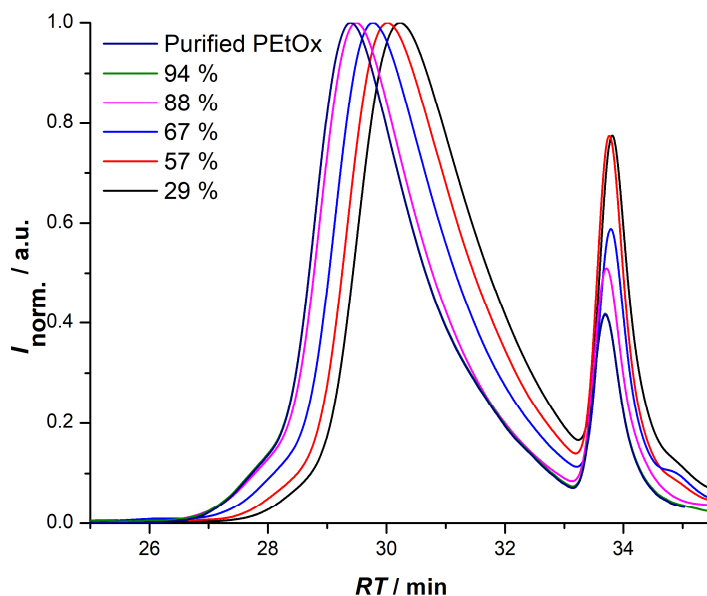

**Figure S11.** Overlay of SEC traces for the CROP of 2-ethyl-2-oxazoline at 50 °C in acetonitrile using **FurMalNos 4** as initiator.  $[EtOx] = 1.5$  M.  $[EtOx]/[FurMalNos] = 20$ .

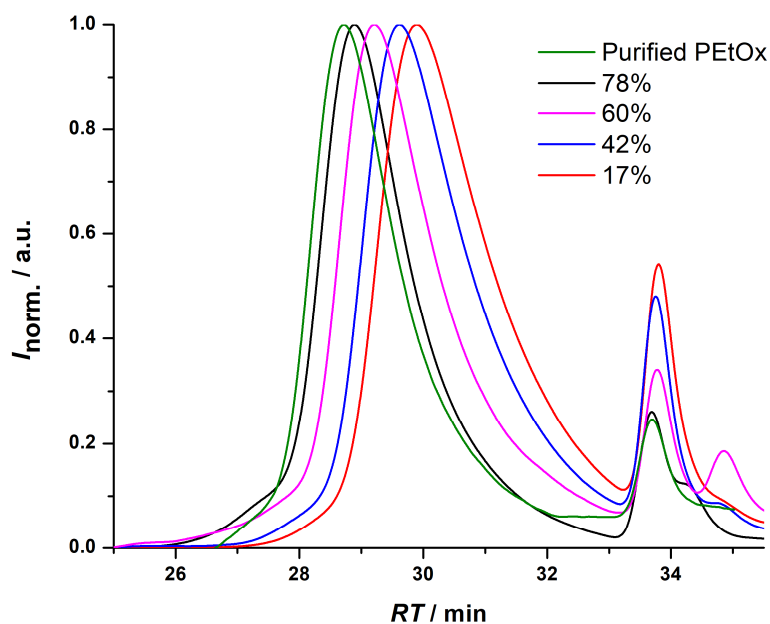

**Figure S12.** Overlay of SEC traces for the CROP of 2-ethyl-2-oxazoline at 50 °C in acetonitrile using **FurMalNos 4** as initiator. [EtOx] = 1.5 M. [EtOx]/[**FurMalNos**] = 40.

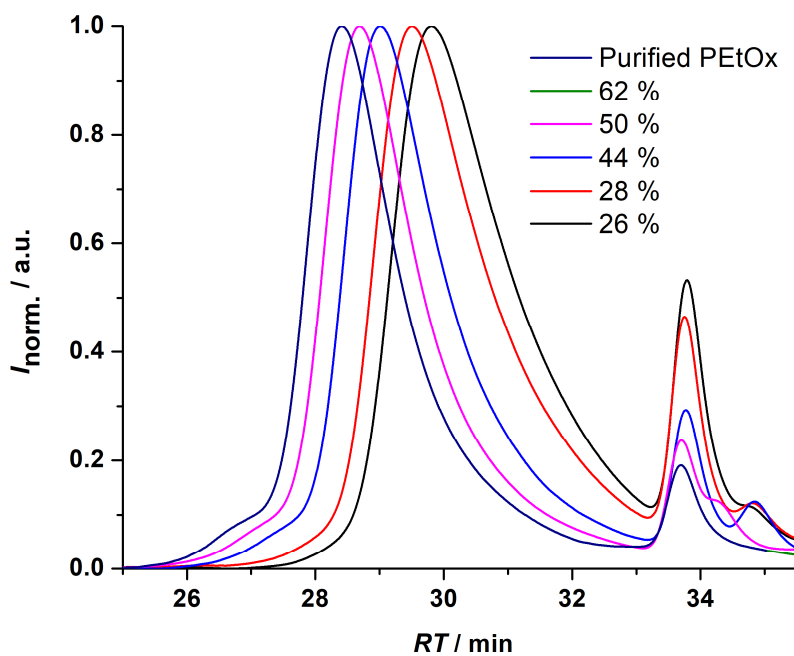

**Figure S13.** Overlay of SEC traces for the CROP of 2-ethyl-2-oxazoline at 50 °C in acetonitrile using **FurMalNos 4** as initiator. [EtOx] = 1.5 M. [EtOx]/[**FurMalNos**] = 60.

The apparent propagation rate constant for each kinetic run (Figure 1) was calculated according to the following expression for the rate of polymerization:

$$-\frac{d[M]}{dt} = k_p \cdot [P^*] \cdot [M]$$

where [M] and [P\*] are the concentration in monomer and propagating species, respectively. Assuming that all initiators simultaneously react upon heating and therefore that [P\*] = [I]<sub>0</sub> (the initial initiator concentration), integration of the previous equation leads to:

$$\ln \frac{[M]_0}{[M]} = k_p \cdot [I]_0 \cdot t$$

**Table S1.** Estimated polymerization rate  $k_p$  of the polymerization of PEtOx with **FurMalNos 4** using three different monomer to initiator ratios.

| [EtOx]/[FurMalNos] | $k_p$ ( $10^{-6} \text{ L mol}^{-1} \text{ s}^{-1}$ ) |
|--------------------|-------------------------------------------------------|
| 20:1               | 158                                                   |
| 40:1               | 166                                                   |
| 60:1               | 160                                                   |

**Table S2.** Summary of the characterization of the final purified products used for this study. Polymerization of EtOx with **FurMalNos** as the initiator.

| $\frac{[\text{EtOx}]}{[\text{FurMalNos}]}$ | Conv. | Yield (%) | $M_{n,\text{theo}}$ ( $\text{g mol}^{-1}$ ) | $M_{n,\text{NMR}}$ ( $\text{g mol}^{-1}$ ) | $M_{n,\text{SEC}}^a$ ( $\text{g mol}^{-1}$ ) | $\bar{D}$ |
|--------------------------------------------|-------|-----------|---------------------------------------------|--------------------------------------------|----------------------------------------------|-----------|
| 20                                         | 94    | 88        | 2190                                        | 4400                                       | 6500                                         | 1.20      |
| 40                                         | 78    | 71        | 4172                                        | 6100                                       | 10600                                        | 1.13      |
| 60                                         | 62    | 56        | 6153                                        | 6700                                       | 11900                                        | 1.16      |

<sup>a</sup>Relative to poly(methyl methacrylate) standards.

## Additional Data for End-Group Transformations

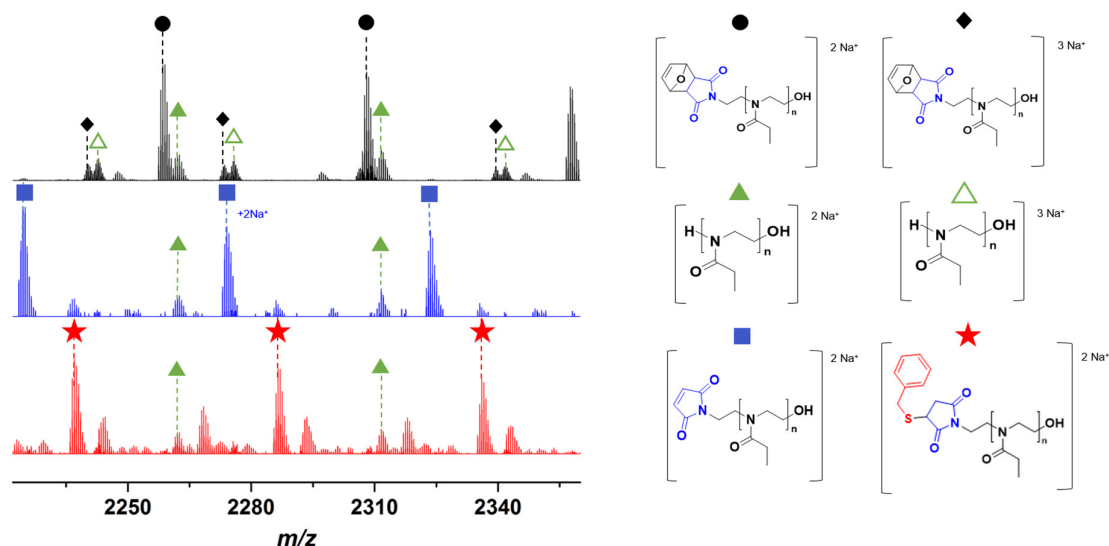

**Figure S14.** Detailed ESI-MS spectra with assignments of (A) **FurMal-PEtOx** as obtained after CROP of EtOx initiated by **FurMalNos**, (B) **Mal-PEtOx** obtained after thermal treatment of **FurMal-PEtOx**, and (C) the Michael addition product of **Mal-PEtOx** with benzyl (**BzMal-PEtOx**).

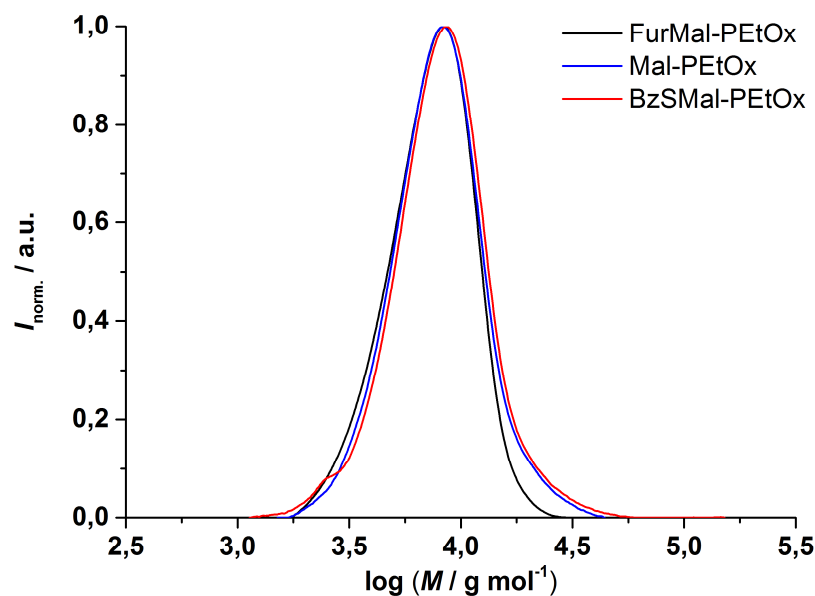

**Figure S15.** Overlay of SEC traces of **FurMal-PEtOx** ( $M_{n,\text{SEC}} = 6500 \text{ g mol}^{-1}$ ,  $\bar{D} = 1.20$ ), its deprotection **Mal-PEtOx** ( $M_{n,\text{SEC}} = 6900 \text{ g mol}^{-1}$ ,  $\bar{D} = 1.24$ ), and **BzSMal-PEtOx** ( $M_{n,\text{SEC}} = 7000 \text{ g mol}^{-1}$ ,  $\bar{D} = 1.27$ ) obtained by Michael addition with benzyl mercaptan.
